# Supplementary material for: Towards biochemically relevant QM computations on nucleic acids: controlled electronic structure geometry optimization of nucleic acid structural motifs using penalty restraint functions
Source: Royal Society of Chemistry journal article supplement (doi:10.1039/c4cp04680c), 2014-11-19
Supplement: c4cp04680c1.pdf [file c4cp04680c1.pdf]

## Supporting Information

Towards biochemically relevant QM computations on nucleic acids. Controlled electronic structure geometry optimizations of nucleic acids structural motifs using penalty restraint functions.

Holger Kruse<sup>1,\*</sup> and Jiri Sponer<sup>1,2\*</sup>

<sup>1</sup>CEITEC – Central European Institute of Technology, Campus Bohunice, Kamenice 5, 625 00 Brno, Czech Republic.

<sup>2</sup>Institute of Biophysics, Academy of Sciences of the Czech Republic, Královopolská 135, 612 65 Brno, Czech Republic.

\*Corresponding authors: kruse@ceitec.muni.cz, sponer@ncbr.muni.cz

**Table S1.**  $\chi$  angle data for the UpA dinucleotide optimization. Cf. Table 1 in the main text for the remaining angles.

| base | X-ray | unrestrained ( $k_r=0$ ) | $k_r=0.01$ | $k_r=0.05$ | $k_r=0.1$ | $k_r=10.0$ |
|------|-------|--------------------------|------------|------------|-----------|------------|
| U    | 213   | 197                      | 222        | 208        | 208       | 210        |
| A    | 224   | 238                      | 192        | 222        | 223       | 225        |

The  $\chi$  angle in Table S1 is not restrained during the optimization so it is only influenced indirectly by the restraints of the  $\delta$  to  $\delta+1$  backbone angles. The indirect restraint of 0.05  $E_h/\text{rad}^2$  keeps the  $\chi$  angle already very close to the starting values. It is a safe assumption that restraining the  $\chi$  angle along with the backbone angles using  $k_r=0.01 E_h/\text{rad}^2$  would also lead to reasonable values of  $\chi$  angles. If necessary, the  $\chi$  angles can be easily controlled by restraints, too. It should be noted that even for the high-resolution X-ray structures, uncertainty of the  $\chi$  angles of  $\sim 10^\circ$  can be expected. None of the computations gave a  $\chi$  angle which would be outside a typical range of RNA  $\chi$  angles; the most populated RNA  $\chi$  angles lie in the range  $180^\circ - 220^\circ$ .

Table S2. UpA optimizations (equivalent to the gas phase Table 1 data) using the COSMO implicit solvent model. While in this particular case even the unrestrained optimization remained rather close to the target structure, we in general cannot rely that the continuum solvent is always sufficient to prevent large artifacts.

|                                         | X-ray | unrestrained ( $k_r=0$ ) | $k_r=0.01$ | $k_r=0.05$ | $k_r=0.1$ | $k_r=10.0$ |
|-----------------------------------------|-------|--------------------------|------------|------------|-----------|------------|
| $\delta$                                | 81.5  | 80.1                     | 80.3       | 83.3       | 81.5      | 81.5       |
| $\epsilon$                              | 199.4 | 200.5                    | 197.0      | 201.1      | 199.7     | 199.4      |
| $\zeta$                                 | 61.2  | 71.2                     | 66.1       | 65.1       | 62.6      | 61.3       |
| $\alpha+1$                              | 168.6 | 171.7                    | 167.9      | 169.2      | 168.0     | 168.6      |
| $\beta+1$                               | 141.6 | 153.3                    | 143.7      | 144.4      | 142.3     | 141.6      |
| $\gamma+1$                              | 48.0  | 35.8                     | 44.5       | 45.7       | 46.8      | 47.8       |
| $\delta+1$                              | 151.3 | 151.8                    | 147.7      | 150.4      | 149.8     | 151.3      |
| $\Delta E (= \Delta E_{\text{step}}^a)$ | -     | 0.0                      | 0.5        | 3.5        | 3.6       | 4.1        |
| $E_{R(p)}$                              | -     | -                        | 0.1        | 0.5        | 0.1       | 0.0        |

## d(G<sub>2</sub>)<sub>4</sub> quadruplex section

**Table S3.** Extension of the Table 2 in the main text - the remaining backbone angles and interatomic distances data.

|                 | X-ray <sup>a</sup> | unrestrained<br>k <sub>r</sub> =0.0 <sup>a</sup> | all<br>angles<br>k <sub>r</sub> = 0.01 | all<br>angles<br>k <sub>r</sub> = 0.05 | β only<br>k <sub>r</sub> =0.05 | β+χ only<br>k <sub>r</sub> = 0.01 | β+χ only<br>k <sub>r</sub> =0.05 |
|-----------------|--------------------|--------------------------------------------------|----------------------------------------|----------------------------------------|--------------------------------|-----------------------------------|----------------------------------|
| strand 2        |                    |                                                  |                                        |                                        |                                |                                   |                                  |
| δ               | 137                | 151                                              | 145                                    | 142                                    | 146                            | 147                               | 148                              |
| ε               | 190                | 163                                              | 182                                    | 188                                    | 179                            | 173                               | 179                              |
| ζ               | 261                | 276                                              | 264                                    | 263                                    | 263                            | 264                               | 262                              |
| α+1             | 286                | 279                                              | 295                                    | 293                                    | 295                            | 295                               | 196                              |
| β+1             | 180                | 239                                              | 188                                    | 184                                    | 183                            | 193                               | 184                              |
| γ+1             | 38                 | 46                                               | 45                                     | 41                                     | 50                             | 49                                | 49                               |
| δ+1             | 137                | 149                                              | 139                                    | 137                                    | 136                            | 143                               | 140                              |
| χ               | 254                | 227                                              | 249                                    | 252                                    | 253                            | 252                               | 253                              |
| χ+1             | 256                | 262                                              | 251                                    | 254                                    | 244                            | 250                               | 254                              |
| r <sub>NO</sub> | 4.6                | 3.1                                              | 4.4                                    | 4.5                                    | 4.5                            | 4.3                               | 4.4                              |
| strand 3        |                    |                                                  |                                        |                                        |                                |                                   |                                  |
| δ               | 144                | 151                                              | 147                                    | 146                                    | 146                            | 146                               | 146                              |
| ε               | 188                | 164                                              | 182                                    | 187                                    | 181                            | 165                               | 166                              |
| ζ               | 262                | 276                                              | 264                                    | 164                                    | 264                            | 270                               | 269                              |
| α+1             | 290                | 279                                              | 291                                    | 291                                    | 293                            | 290                               | 290                              |
| β+1             | 180                | 239                                              | 186                                    | 181                                    | 183                            | 208                               | 204                              |
| γ+1             | 45                 | 46                                               | 48                                     | 48                                     | 49                             | 49                                | 49                               |
| δ+1             | 122                | 149                                              | 132                                    | 125                                    | 136                            | 145                               | 144                              |
| χ               | 253                | 227                                              | 251                                    | 252                                    | 250                            | 250                               | 253                              |
| χ+1             | 247                | 262                                              | 246                                    | 246                                    | 246                            | 251                               | 249                              |
| r <sub>NO</sub> | 4.7                | 3.1                                              | 4.4                                    | 4.6                                    | 4.5                            | 4.2                               | 4.2                              |
| strand 4        |                    |                                                  |                                        |                                        |                                |                                   |                                  |
| δ               | 139                | 151                                              | 145                                    | 143                                    | 146                            | 147                               | 147                              |
| ε               | 179                | 164                                              | 177                                    | 178                                    | 177                            | 172                               | 175                              |
| ζ               | 260                | 276                                              | 164                                    | 263                                    | 264                            | 263                               | 262                              |
| α+1             | 290                | 279                                              | 290                                    | 290                                    | 293                            | 293                               | 293                              |
| β+1             | 289                | 240                                              | 192                                    | 188                                    | 191                            | 195                               | 191                              |
| γ+1             | 54                 | 46                                               | 50                                     | 52                                     | 49                             | 49                                | 50                               |
| δ+1             | 129                | 149                                              | 137                                    | 132                                    | 141                            | 142                               | 141                              |
| χ               | 254                | 226                                              | 251                                    | 253                                    | 250                            | 253                               | 253                              |
| χ+1             | 245                | 262                                              | 247                                    | 245                                    | 250                            | 248                               | 246                              |
| r <sub>NO</sub> | 4.7                | 3.1                                              | 4.4                                    | 4.6                                    | 4.5                            | 4.3                               | 4.4                              |

<sup>a</sup> data taken from ref.<sup>1</sup>

## d(ACGT)<sub>2</sub> section

Note, that the d(ACGT)<sub>2</sub> X-ray structure has a true crystallographic two-fold symmetry, so that its two experimental strands are identical. However, the QM optimization was carried out without any symmetry restrictions, leading to asymmetric local minimum structures.

**Table S4.** Extension of Table 3 of the main text - the remaining backbone angles and interatomic distances data.

|                    | X-ray | unrestrained<br>k <sub>r</sub> =0.0 | k <sub>r</sub> =0.01 | k <sub>r</sub> =0.05 | k <sub>r</sub> =0.1 | k <sub>r</sub> =10.0 |
|--------------------|-------|-------------------------------------|----------------------|----------------------|---------------------|----------------------|
| CpG step, strand 1 |       |                                     |                      |                      |                     |                      |
| δ                  | 106   | 114                                 | 117                  | 110                  | 106                 | 106                  |
| ε                  | 188   | 115                                 | 172                  | 182                  | 187                 | 188                  |
| ζ                  | 248   | 300                                 | 245                  | 243                  | 249                 | 248                  |
| α+1                | 311   | 266                                 | 307                  | 309                  | 311                 | 311                  |
| β+1                | 172   | 256                                 | 188                  | 180                  | 175                 | 172                  |
| γ+1                | 46    | 49                                  | 47                   | 46                   | 48                  | 46                   |
| δ+1                | 141   | 144                                 | 143                  | 142                  | 140                 | 141                  |
| GpT step, strand 1 |       |                                     |                      |                      |                     |                      |
| δ                  | 141   | 144                                 | 143                  | 142                  | 140                 | 141                  |
| ε                  | 184   | 170                                 | 181                  | 193                  | 181                 | 184                  |
| ζ                  | 265   | 272                                 | 269                  | 267                  | 265                 | 265                  |
| α+1                | 290   | 295                                 | 290                  | 289                  | 290                 | 290                  |
| β+1                | 178   | 178                                 | 181                  | 178                  | 176                 | 178                  |
| γ+1                | 59    | 50                                  | 53                   | 56                   | 58                  | 59                   |
| δ+1                | 108   | 105                                 | 111                  | 108                  | 108                 | 108                  |
| ApC step, strand 2 |       |                                     |                      |                      |                     |                      |
| δ                  | 124   | 145                                 | 141                  | 128                  | 127                 | 124                  |
| ε                  | 198   | 184                                 | 190                  | 195                  | 196                 | 198                  |
| ζ                  | 242   | 278                                 | 265                  | 248                  | 244                 | 242                  |
| α+1                | 311   | 292                                 | 306                  | 311                  | 311                 | 311                  |
| β+1                | 147   | 173                                 | 158                  | 148                  | 148                 | 147                  |
| γ+1                | 56    | 46                                  | 53                   | 55                   | 56                  | 56                   |
| δ+1                | 106   | 117                                 | 117                  | 110                  | 107                 | 106                  |
| CpG step, strand 2 |       |                                     |                      |                      |                     |                      |
| δ                  | 106   | 117                                 | 117                  | 110                  | 107                 | 106                  |
| ε                  | 188   | 112                                 | 176                  | 182                  | 186                 | 188                  |
| ζ                  | 248   | 297                                 | 144                  | 243                  | 249                 | 248                  |
| α+1                | 311   | 263                                 | 306                  | 109                  | 311                 | 311                  |
| β+1                | 172   | 253                                 | 158                  | 180                  | 174                 | 172                  |
| γ+1                | 46    | 54                                  | 53                   | 46                   | 48                  | 46                   |
| δ+1                | 141   | 143                                 | 142                  | 141                  | 140                 | 141                  |
| GpT, strand 2      |       |                                     |                      |                      |                     |                      |
| δ                  | 141   | 143                                 | 142                  | 141                  | 140                 | 141                  |
| ε                  | 184   | 132                                 | 184                  | 184                  | 181                 | 184                  |
| ζ                  | 265   | 289                                 | 272                  | 267                  | 265                 | 265                  |
| α+1                | 290   | 291                                 | 191                  | 289                  | 290                 | 290                  |
| β+1                | 178   | 223                                 | 176                  | 177                  | 176                 | 178                  |
| γ+1                | 59    | 48                                  | 53                   | 56                   | 58                  | 59                   |
| δ+1                | 108   | 145                                 | 108                  | 108                  | 107                 | 108                  |

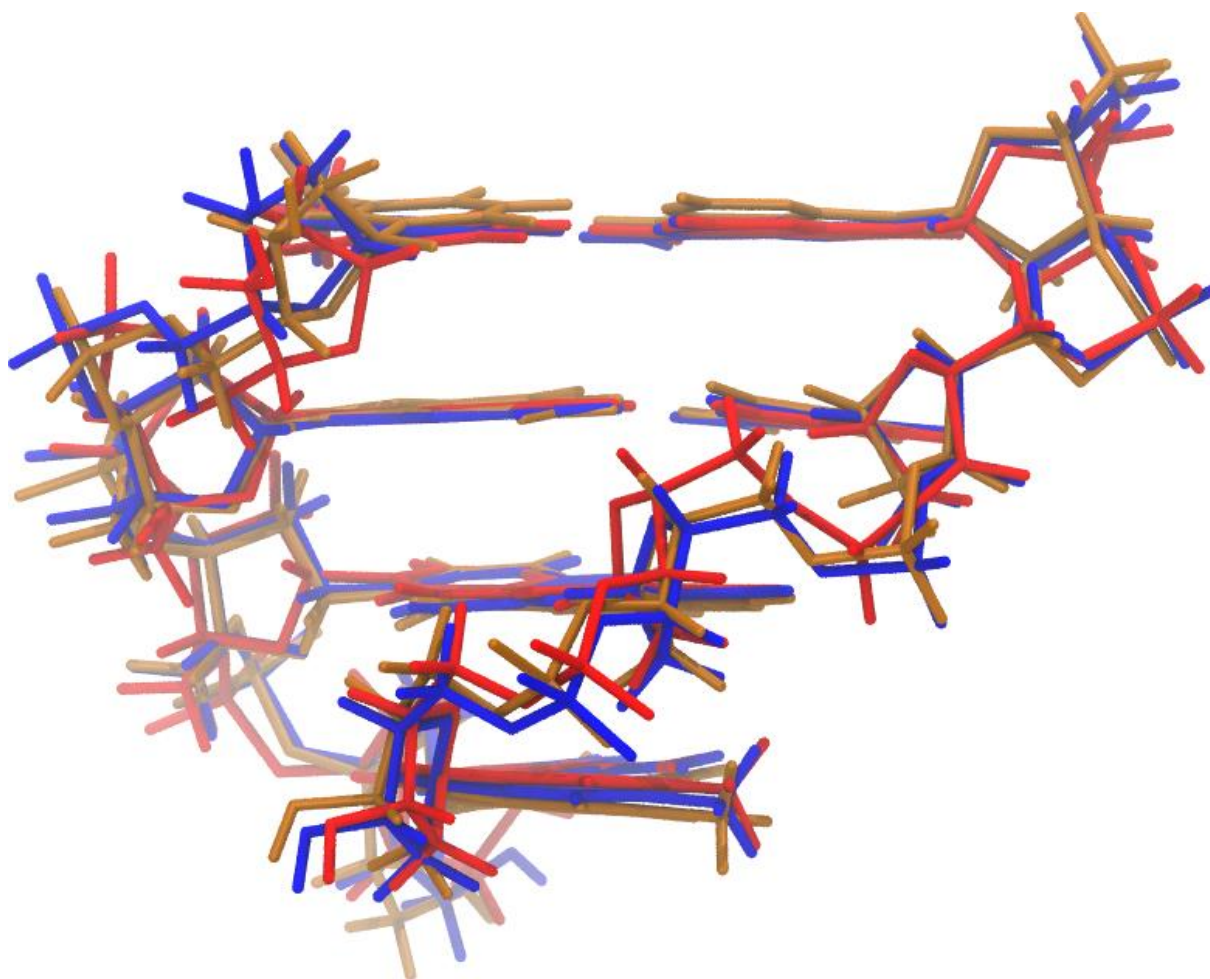

**Figure S1.** Color-coded side view of the X-ray (orange), unrestrained (red) and restrained (blue,  $k_r=0.05$ ) structures of the d(ACGT)<sub>2</sub> B-DNA system. The restrained optimization structure clearly shows improvements for the backbone topology.

**Helical parameters - the base pairs and base-pair steps.** The parameter analysis shown in Table S4 was done using the 3DNA code.<sup>2</sup> The unrestrained optimization leads to an underestimation of the propeller twist, which is only partly improved using the backbone angle restraints. We expect further improvement if we additionally restrain the  $\chi$  angles. At this point it is unclear if the underestimated propeller twist is an artefact of the HF-3c method or if this particular property is just very sensitive to the level of theory in general. The unrestrained structure further shows a reduced twist (helicity). From all restrained optimizations, the restraint with  $k_r=0.05$  E<sub>h</sub>/rad<sup>2</sup> yields the twist parameter closest to the X-ray structure. The stronger restraints ( $k_r>0.05$  E<sub>h</sub>/rad<sup>2</sup>) seem to have an over-twisting tendency. The buckle and inclination show an irregular behaviour among all optimizations and no clear tendencies regarding different restraining constants. However, the middle-strong restraint with  $k_r=0.05$  E<sub>h</sub>/rad<sup>2</sup> gives reasonable values for the Inclinations. The deviations in the buckle are particularly strong in the terminal bases, suggesting that the missing molecular environment might be the main cause of the error in this case ('terminal effects'). It is, however, clear that a more thorough study is needed to understand all structural deviations and parameters in this system, as well as the exact influences of the restraints. As pointed in the main text, quantitative description of details of B-DNA structure is difficult and is hampered by the lack of unambiguous experimental data. The B-DNA is a highly flexible molecule with sequence-dependent structural dynamics heterogeneity. The atomistic X-ray structures are always affected by averaging, resolution limits and crystal

packing. Therefore, it is presently not known if B-DNA optimizations should be restrained (and how tightly) according to the individual X-ray structures or rather by using some averaged or idealized structural parameters.

**Table S5.** Local base-pair, base-pair step and helical parameters of the d(ACGT)<sub>2</sub> structures obtained using the standard 3DNA code.

| Base pair | X-ray  |         |         |        |           |         |
|-----------|--------|---------|---------|--------|-----------|---------|
|           | Shear  | Stretch | Stagger | Buckle | Propeller | Opening |
| 1 A-T     | 0.06   | -0.11   | 0.29    | 7.25   | -12.05    | 3.98    |
| 2 C-G     | 0.28   | -0.16   | -0.10   | 10.51  | -13.26    | -0.04   |
| 3 G-C     | -0.28  | -0.16   | -0.10   | -10.51 | -13.26    | -0.04   |
| 4 T-A     | -0.06  | -0.11   | 0.29    | -7.25  | -12.05    | 3.98    |
| ave.      | 0.00   | -0.14   | 0.09    | 0.00   | -12.65    | 1.97    |
| Step      | Shift  | Slide   | Rise    | Tilt   | Roll      | Twist   |
| 1 AC/GT   | 0.29   | -0.36   | 3.27    | 2.75   | -1.25     | 31.36   |
| 2 CG/CG   | 0.00   | -0.02   | 3.79    | 0.00   | 7.52      | 42.15   |
| 3 GT/AC   | -0.29  | -0.36   | 3.27    | -2.75  | -1.25     | 31.36   |
| ave.      | 0.00   | -0.25   | 3.44    | 0.00   | 1.67      | 34.95   |
| Step      | X-disp | Y-disp  | h-Rise  | Incl.  | Tip       | h-Twist |
| 1 AC/GT   | -0.44  | -0.03   | 3.29    | -2.30  | -5.07     | 31.50   |
| 2 CG/CG   | -0.90  | 0.00    | 3.73    | 10.36  | 0.00      | 42.78   |
| 3 GT/AC   | -0.44  | 0.03    | 3.29    | -2.30  | 5.07      | 31.50   |
| ave.      | -0.59  | 0.00    | 3.44    | 1.92   | 0.00      | 35.26   |

| Base pair | unrestrained |         |         |        |           |         |
|-----------|--------------|---------|---------|--------|-----------|---------|
|           | Shear        | Stretch | Stagger | Buckle | Propeller | Opening |
| 1 A-T     | 0.10         | -0.14   | 0.33    | 7.22   | -9.42     | -2.03   |
| 2 C-G     | 0.07         | -0.17   | -0.09   | 8.55   | -4.09     | -1.03   |
| 3 G-C     | -0.10        | -0.17   | -0.14   | -7.66  | -4.66     | -1.15   |
| 4 T-A     | -0.02        | -0.14   | 0.09    | 0.06   | -5.61     | 0.47    |
| ave.      | 0.01         | -0.16   | 0.05    | 2.04   | -5.94     | -0.93   |
| Step      | Shift        | Slide   | Rise    | Tilt   | Roll      | Twist   |
| 1 AC/GT   | 1.00         | -0.33   | 3.16    | 4.30   | -3.31     | 31.55   |
| 2 CG/CG   | -0.11        | -0.40   | 3.42    | 0.24   | 4.50      | 41.62   |
| 3 GT/AC   | -0.29        | -0.24   | 2.99    | -2.05  | -0.35     | 27.01   |
| ave.      | 0.20         | -0.33   | 3.19    | 0.83   | 0.28      | 33.39   |
| Step      | X-disp       | Y-disp  | h-Rise  | Incl.  | Tip       | h-Twist |
| 1 AC/GT   | -0.01        | -1.04   | 3.28    | -6.04  | -7.84     | 32.00   |
| 2 CG/CG   | -1.05        | 0.18    | 3.36    | 6.32   | -0.33     | 41.86   |
| 3 GT/AC   | -0.44        | 0.15    | 3.01    | -0.75  | 4.38      | 27.08   |
| ave.      | -0.50        | -0.24   | 3.22    | -0.16  | -1.27     | 33.65   |

| Base pair | restraint $k_r=0.01$ |         |         |        |           |         |
|-----------|----------------------|---------|---------|--------|-----------|---------|
|           | Shear                | Stretch | Stagger | Buckle | Propeller | Opening |
| 1 A-T     | 0.04                 | -0.15   | 0.00    | -2.88  | -4.48     | 0.20    |
| 2 C-G     | 0.07                 | -0.16   | -0.10   | 8.19   | -4.90     | -1.22   |

|         |        |        |        |        |       |         |
|---------|--------|--------|--------|--------|-------|---------|
| 3 G-C   | -0.04  | -0.14  | -0.15  | -12.10 | -7.50 | -0.60   |
| 4 T-A   | -0.09  | -0.14  | 0.09   | -3.59  | -6.36 | -0.83   |
| ave.    | -0.01  | -0.15  | -0.04  | -2.59  | -5.81 | -0.61   |
| Step    | Shift  | Slide  | Rise   | Tilt   | Roll  | Twist   |
| 1 AC/GT | 0.41   | -0.35  | 2.94   | 0.68   | -1.35 | 26.94   |
| 2 CG/CG | 0.15   | -0.15  | 3.48   | 1.26   | 6.31  | 46.39   |
| 3 GT/AC | -0.68  | -0.48  | 2.98   | -2.04  | -1.75 | 29.09   |
| ave.    | -0.04  | -0.33  | 3.13   | -0.03  | 1.07  | 34.14   |
| Step    | X-disp | Y-disp | h-Rise | Incl.  | Tip   | h-Twist |
| 1 AC/GT | -0.45  | -0.73  | 2.96   | -2.89  | -1.46 | 26.98   |
| 2 CG/CG | -0.75  | -0.08  | 3.44   | 7.97   | -1.59 | 46.81   |
| 3 GT/AC | -0.60  | 0.94   | 3.05   | -3.48  | 4.05  | 29.21   |
| ave.    | -0.60  | 0.04   | 3.15   | 0.53   | 0.33  | 34.33   |

**restraint  $k_r=0.05$**

| Base pair | Shear  | Stretch | Stagger | Buckle | Propeller | Opening |
|-----------|--------|---------|---------|--------|-----------|---------|
| 1 A-T     | 0.08   | -0.15   | 0.04    | -0.88  | -8.40     | -0.52   |
| 2 C-G     | 0.04   | -0.15   | -0.10   | 6.75   | -7.04     | -0.83   |
| 3 G-C     | -0.05  | -0.15   | -0.10   | -7.70  | -6.56     | -0.78   |
| 4 T-A     | -0.08  | -0.15   | 0.04    | 0.76   | -7.25     | -0.19   |
| ave.      | 0.00   | -0.15   | -0.03   | -0.27  | -7.31     | -0.58   |
| Step      | Shift  | Slide   | Rise    | Tilt   | Roll      | Twist   |
| 1 AC/GT   | 0.53   | -0.37   | 2.99    | 1.07   | -1.74     | 29.26   |
| 2 CG/CG   | 0.01   | 0.02    | 3.40    | -0.20  | 7.80      | 46.20   |
| 3 GT/AC   | -0.50  | -0.39   | 2.98    | -1.06  | -1.76     | 29.58   |
| ave.      | 0.02   | -0.25   | 3.12    | -0.06  | 1.43      | 35.01   |
| Step      | X-disp | Y-disp  | h-Rise  | Incl.  | Tip       | h-Twist |
| 1 AC/GT   | -0.39  | -0.83   | 3.02    | -3.44  | -2.12     | 29.33   |
| 2 CG/CG   | -0.65  | -0.03   | 3.36    | 9.85   | 0.25      | 46.82   |
| 3 GT/AC   | -0.42  | 0.76    | 3.01    | -3.45  | 2.08      | 29.65   |
| ave.      | -0.48  | -0.03   | 3.13    | 0.99   | 0.07      | 35.26   |

**restraint  $k_r=0.1$**

| Base pair | Shear  | Stretch | Stagger | Buckle | Propeller | Opening |
|-----------|--------|---------|---------|--------|-----------|---------|
| 1 A-T     | 0.03   | -0.15   | 0.02    | -4.48  | -7.60     | 0.79    |
| 2 C-G     | 0.06   | -0.17   | -0.03   | 0.28   | -12.44    | -1.26   |
| 3 G-C     | -0.06  | -0.18   | 0.00    | 0.83   | -11.98    | -1.43   |
| 4 T-A     | -0.03  | -0.14   | 0.02    | 6.43   | -7.02     | 1.05    |
| ave.      | 0.00   | -0.16   | 0.00    | 0.77   | -9.76     | -0.21   |
| Step      | Shift  | Slide   | Rise    | Tilt   | Roll      | Twist   |
| 1 AC/GT   | -0.04  | -0.01   | 3.07    | 1.01   | -3.69     | 32.89   |
| 2 CG/CG   | -0.03  | 0.81    | 3.36    | -0.12  | 4.97      | 42.44   |
| 3 GT/AC   | 0.08   | 0.05    | 3.06    | -0.77  | -3.72     | 32.66   |
| ave.      | 0.00   | 0.29    | 3.16    | 0.04   | -0.81     | 36.00   |
| Step      | X-disp | Y-disp  | h-Rise  | Incl.  | Tip       | h-Twist |
| 1 AC/GT   | 0.57   | 0.23    | 3.05    | -6.48  | -1.77     | 33.10   |

|         |      |       |      |       |       |       |
|---------|------|-------|------|-------|-------|-------|
| 2 CG/CG | 0.60 | 0.03  | 3.43 | 6.84  | 0.16  | 42.72 |
| 3 GT/AC | 0.69 | -0.26 | 3.03 | -6.59 | 1.36  | 32.87 |
| ave.    | 0.62 | 0.00  | 3.17 | -2.08 | -0.08 | 36.23 |

**restraint  $k_r=10.0$**

| Base pair | Shear  | Stretch | Stagger | Buckle | Propeller | Opening |
|-----------|--------|---------|---------|--------|-----------|---------|
| 1 A-T     | 0.02   | -0.14   | -0.01   | -7.09  | -6.49     | 2.12    |
| 2 C-G     | 0.07   | -0.17   | -0.01   | -0.08  | -12.60    | -1.36   |
| 3 G-C     | -0.07  | -0.17   | -0.01   | -0.99  | -12.35    | -1.57   |
| 4 T-A     | -0.02  | -0.14   | 0.00    | 7.29   | -4.98     | 1.80    |
| ave.      | 0.00   | -0.16   | -0.01   | -0.22  | -9.10     | 0.25    |
| Step      | Shift  | Slide   | Rise    | Tilt   | Roll      | Twist   |
| 1 AC/GT   | -0.17  | -0.05   | 3.03    | 0.11   | -1.22     | 32.36   |
| 2 CG/CG   | -0.03  | 0.72    | 3.34    | -0.08  | 5.82      | 41.66   |
| 3 GT/AC   | 0.17   | -0.03   | 3.01    | -0.33  | -1.62     | 32.10   |
| ave.      | -0.01  | 0.21    | 3.13    | -0.10  | 1.00      | 35.38   |
| Step      | X-disp | Y-disp  | h-Rise  | Incl.  | Tip       | h-Twist |
| 1 AC/GT   | 0.11   | 0.32    | 3.03    | -2.19  | -0.19     | 32.38   |
| 2 CG/CG   | 0.38   | 0.04    | 3.41    | 8.14   | 0.11      | 42.05   |
| 3 GT/AC   | 0.22   | -0.36   | 3.01    | -2.92  | 0.59      | 32.15   |
| ave.      | 0.23   | 0.00    | 3.15    | 1.01   | 0.17      | 35.53   |

#### Structure data

see the provided zip file or <http://dx.doi.org/10.6084/m9.figshare.1233996>

#### Source code

see the provided zip file or request an up-to-date version from the authors.

The code is also shared on github.com: <https://github.com/hokru/xopt>

#### References

1. Šponer, J.; Mládek, A.; Špačková, N.; Cang, X.; Cheatham, T. E.; Grimme, S., Relative Stability of Different DNA Guanine Quadruplex Stem Topologies Derived Using Large-Scale Quantum-Chemical Computations. *Journal of the American Chemical Society* **2013**, *135* (26), 9785-9796.
2. Lu, X. J.; Olson, W. K., 3DNA: a software package for the analysis, rebuilding and visualization of three-dimensional nucleic acid structures. *Nucleic Acids Res.* **2003**, *31* (17), 5108-5121.
